# Supplementary material
Source: publisher figshare collection journal article supplement (https://acs.figshare.com/ndownloader/files/5681409)
Supplement: Supplementary file 1 [file 5681409]

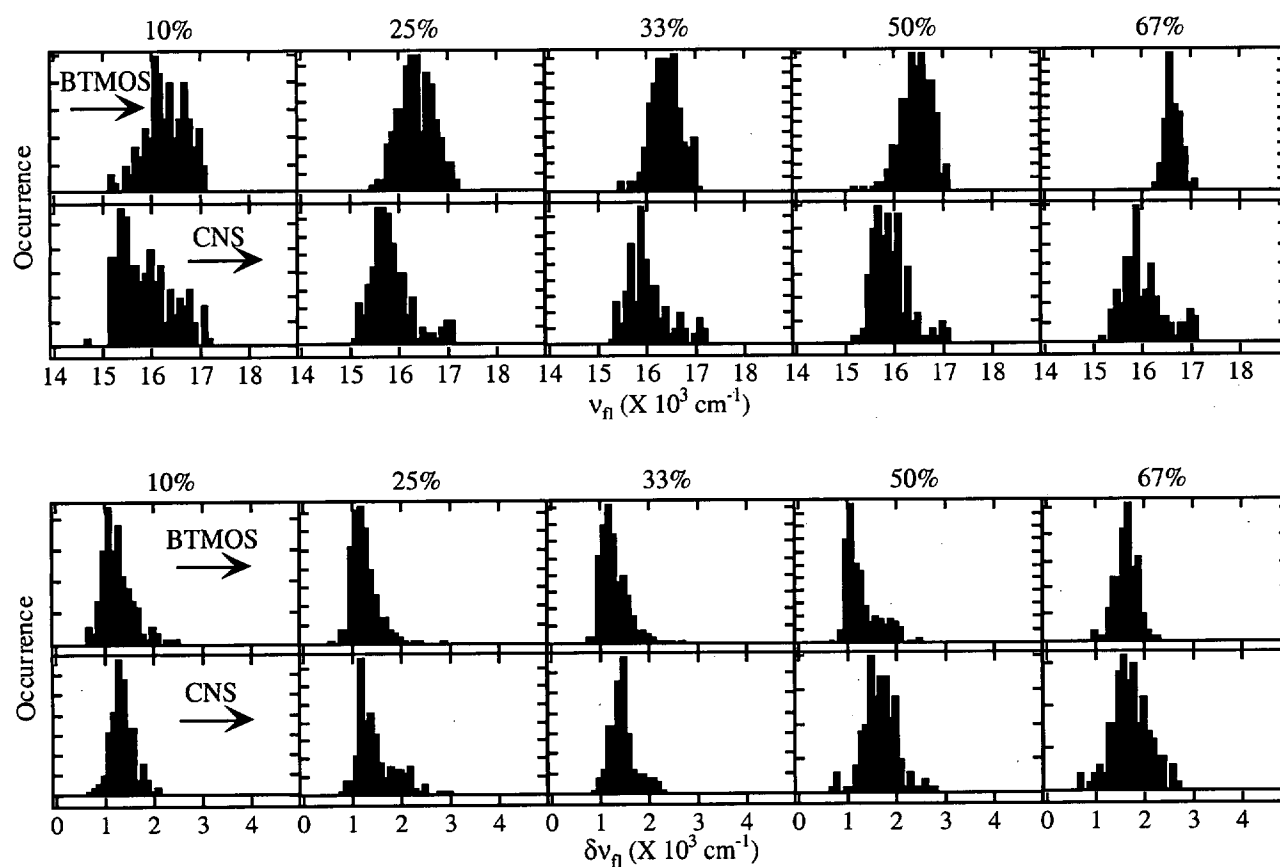

**Figure S1.** Histograms of the emission maximum,  $\nu_{fl}$ , (top pair of rows) and the emission bandwidth,  $\delta\nu_{fl}$ , (bottom pair of rows) for NR in films prepared from sols containing BTMOS (top row in pair) and CNS (bottom row in pair). The vertical axis in each histogram gives the number of occurrences for each value. The tick marks for the  $\nu_{fl}$  data denote increments of three. Those for the  $\delta\nu_{fl}$  data denote increments of five. Data are for films comprised of 10%, 25%, 33%, 50%, and 67% organic modifier are shown.

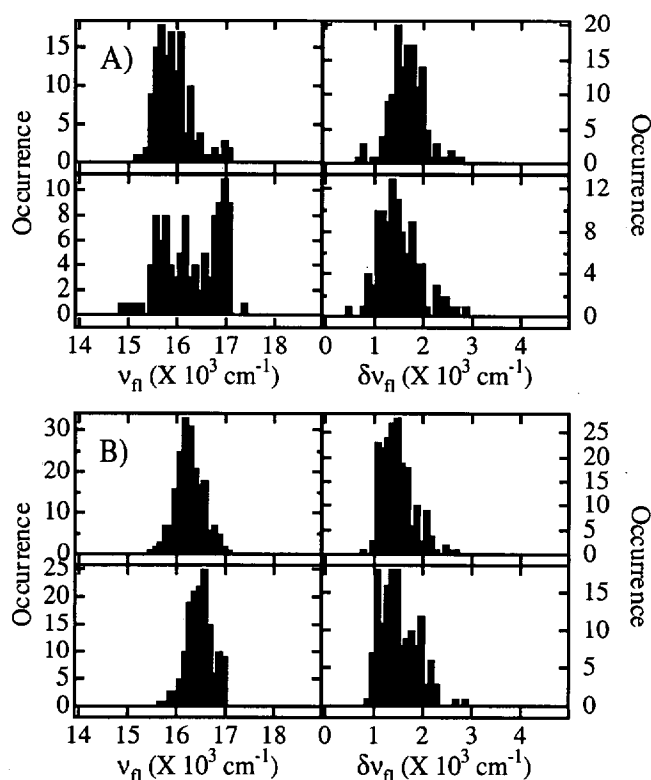

**Figure S2.** Comparison of films prepared from cohydrolyzed and separately hydrolyzed sols. A)  $\nu_{fl}$  and  $\delta\nu_{fl}$  histograms for films containing 50% CNS and 50% TEOS prepared by (top) cohydrolysis of the materials and (bottom) mixing separately hydrolyzed 50% CNS and 50% TEOS sols. B)  $\nu_{fl}$  and  $\delta\nu_{fl}$  histograms for films containing 25% CNS, 25% BTMOS, and 50% TEOS prepared by (top) cohydrolysis of all materials and (bottom) mixing separately hydrolyzed 50% CNS/TEOS and 50% BTMOS/TEOS sols.
